# Supplementary material
Source: HighWire-hosted journal article supplement (http://jpet.aspetjournals.org/highwire/filestream/136652/field_highwire_adjunct_files/0/jpet230730_suppl_figure.pdf)

JPET #230730

**Fasiglifam/TAK-875, a Selective GPR40 Agonist, Improves Hyperglycemia in Rats**

**Unresponsive to Sulfonylureas and Acts Additively With Sulfonylureas**

Ryo Ito, Yoshiyuki Tsujihata, Masami Suzuki, Kazumasa Miyawaki, Kae Matsuda and

Koji Takeuchi

**The Journal of Pharmacology and Experimental Therapeutics**

## **Supplemental Figure Legend**

### **Supplemental figure 1**

Effect of glimepiride on glucose tolerance and insulin secretion during oral glucose tolerance test in male N-STZ-1.5 rats. (A) and (B) show time-dependent changes in plasma glucose and insulin levels, respectively, after glucose load (1.5 g/kg) in N-STZ-1.5 rats treated with vehicle (Veh) or 3-30 mg/kg of glimepiride (Glime). Values are mean  $\pm$  SD (n=6).

Supplemental figure 1

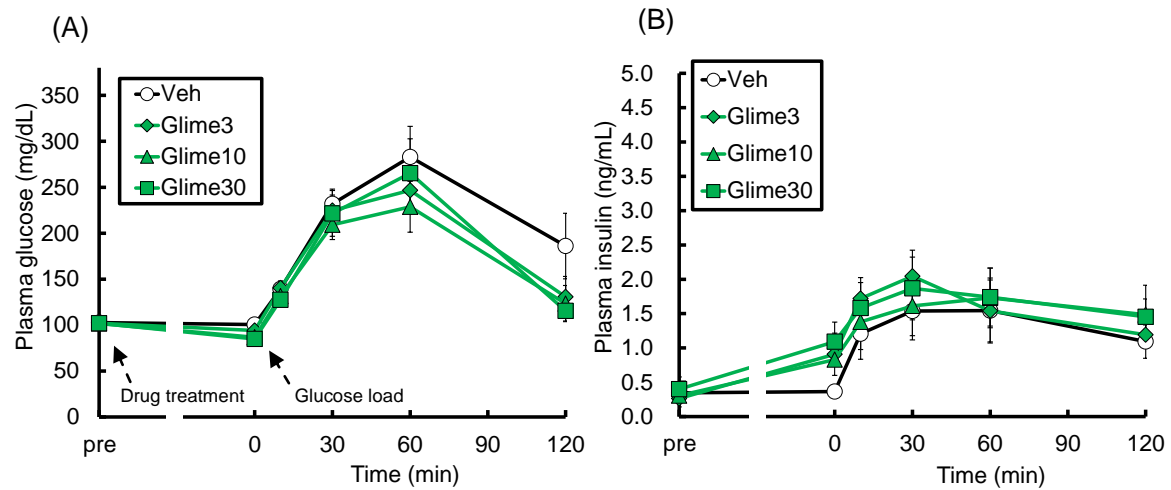

Supplement: jpet230730_suppl_figure.pdf [file jpet230730_suppl_figure.pdf]
